# Supplementary material
Source: PubMed Central journal article supplement (PMC10992079)
Supplement: 262_2023_3581_MOESM1_ESM.pdf [file 262_2023_3581_MOESM1_ESM.pdf]

# SUPPLEMENTARY APPENDIX

Supplement to: 'Tumor characteristics of dissociated response to immune checkpoint inhibition in advanced melanoma'

## Contents

|                                                                                   |   |
|-----------------------------------------------------------------------------------|---|
| <b>Suppl. Table 1.</b> Treatment details per patient                              | 2 |
| <b>Suppl. Table 2.</b> Overview of DNA mutation in focused analyses               | 3 |
| <b>Suppl. Figure 1.</b> MCP counter and Danaher gene expression data of patient 1 | 4 |
| <b>Suppl. Figure 2.</b> MCP counter and Danaher gene expression data of patient 2 | 5 |
| <b>Suppl. Figure 3.</b> MCP counter and Danaher gene expression data of patient 3 | 6 |
| <b>Suppl. Figure 4.</b> MCP counter and Danaher gene expression data of patient 4 | 7 |
| <b>Suppl. Figure 5.</b> MCP counter and Danaher gene expression data of patient 5 | 8 |

**Suppl. Table 1.** Treatment details per patient

| Patient | prior DTIC | BOR to DITC | prior ICI | BOR to prior ICI | ICI treatment | BOR to ICI | subsequent treatment | BOR to subsequent treatment |
|---------|------------|-------------|-----------|------------------|---------------|------------|----------------------|-----------------------------|
| pat 1   |            |             |           |                  | IPI+NIVO      | PD*        |                      |                             |
| pat 2   |            |             |           |                  | PEM           | PR         | PEM                  | PD                          |
| pat 3   | yes        | SD          | IPI       | PD               | PEM           | PR         |                      |                             |
| pat 4   |            |             |           |                  | NIVO          | PR         |                      |                             |
| pat 5   |            |             | IPI + PEM | NE + PR          | PEM           | PR         |                      |                             |
| pat 6   |            |             |           |                  | NIVO          | MR         | NIVO                 |                             |
| pat 7   |            |             |           |                  | PEM           | PD         | IPI                  | PR                          |
| pat 8   |            |             |           |                  | IPI+NIVO      | PR         | NIVO                 |                             |
| pat 9   |            |             |           |                  | NIVO          | PR         |                      |                             |
| pat 10  |            |             |           |                  | PEM           | CR         |                      |                             |

\*response on subsequent radiotherapy treatment.

BOR: best overall response; ICI: immune checkpoint inhibition; IPI: ipilimumab; NIVO: nivolumab; PEM: pembrolizumab; PD: progressive disease; PR: partial response; MR: mixed response; CR: complete response; NE: non-evaluable.

**Suppl. Table 2.** Overview of DNA mutation in focused analyses

| <b>Antigen processing + presentation</b> | <b>Immune checkpoints</b>    | <b>Resistance mechanisms</b> | <b>DNA damage response</b> |
|------------------------------------------|------------------------------|------------------------------|----------------------------|
| TAP1                                     | CTLA-4                       | PTEN                         | BRCA1                      |
| TAP2                                     | PD-1                         | EGFR                         | BRCA2                      |
| TAPBP                                    | LAG-3                        | MYC                          | ATM                        |
| TAPBPL                                   | TIM-3                        |                              | POLE                       |
| HLA-A                                    | TIGIT                        | <b>β-catenin signaling</b>   | FANCE                      |
| HLA-B                                    | VISTA                        | SOX2                         | ERCC2                      |
| HLA-C                                    | BTLA                         | SOX11                        | MDH6                       |
| B2M                                      |                              | WNT7B                        |                            |
| CALR                                     | <b>Interferon + JAK/STAT</b> | EFNB3                        | <b>TNF signaling</b>       |
| NLCR5                                    | IFNG                         | APC2                         | CASP8                      |
| PSMB9                                    | IRF                          | TCF1                         | TNFRS1A                    |
| PSMB10                                   | STAT1                        | cMYC                         | ADO                        |
| PSME1                                    | JAK1                         | TCF12                        | AQSTM1                     |
| PSME2                                    | JAK2                         | VEGFA                        | GOSR1                      |
| PSME3                                    | IFNGR1                       |                              |                            |
| RFX5                                     | IFNGR2                       | <b>Chemokines</b>            |                            |
| HSP90AB1                                 | SOCS1                        | CXCL9                        |                            |
| CANX                                     | PIAS4                        | CXCL10                       |                            |
| ERp57                                    |                              | CCR4                         |                            |
| ERAP1                                    |                              | CCR7                         |                            |
| ERAP2                                    |                              |                              |                            |

Suppl. Figure 1. MCP counter and Danaher gene expression data of patient 1

**A**

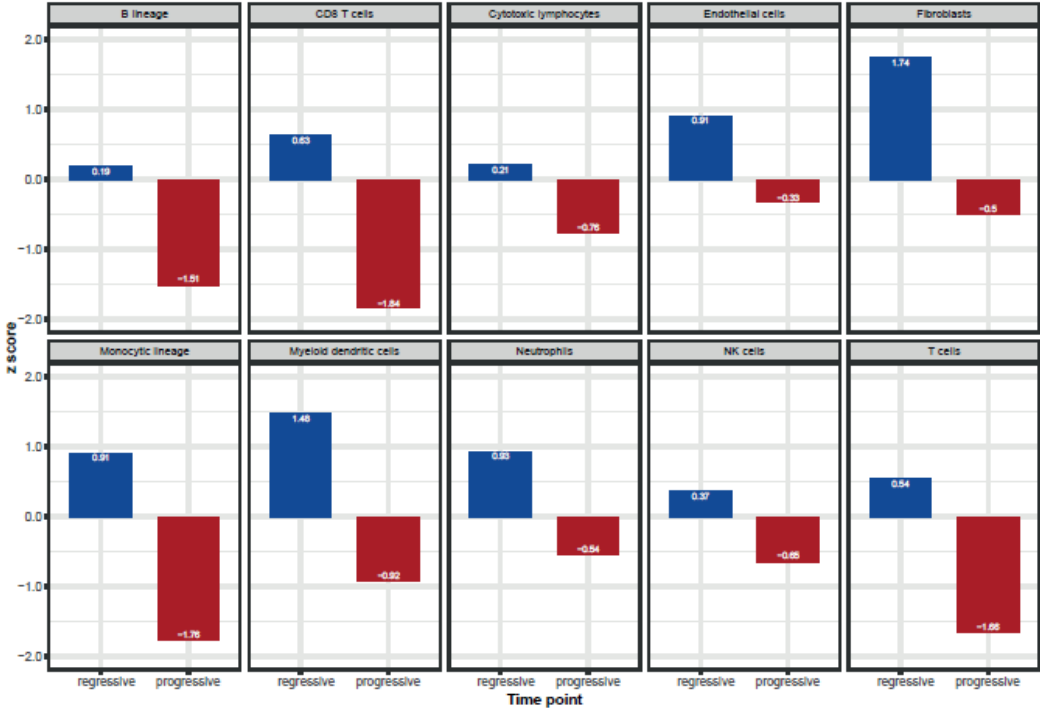

**B**

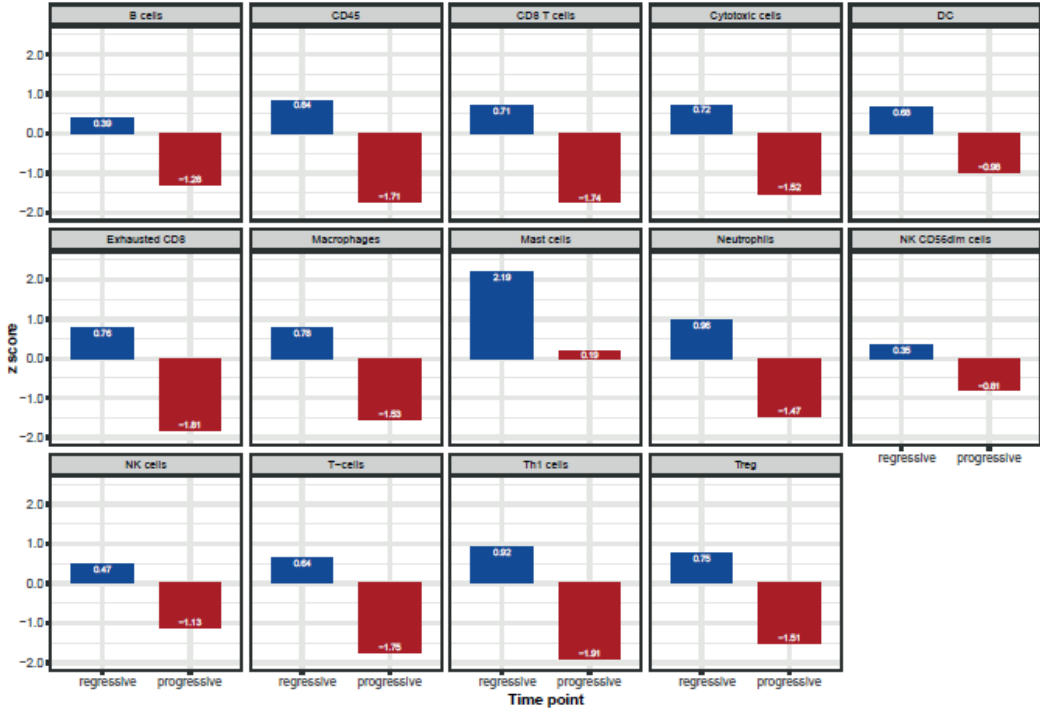

A. Overview of expression of MCP counter genes, in blue for regressive and in red for progressive tumor lesion.  
 B. Overview of expression of Danaher genes, in blue for regressive and in red for progressive tumor lesion.

Suppl. Figure 2. MCP counter and Danaher gene expression data of patient 2

**A**

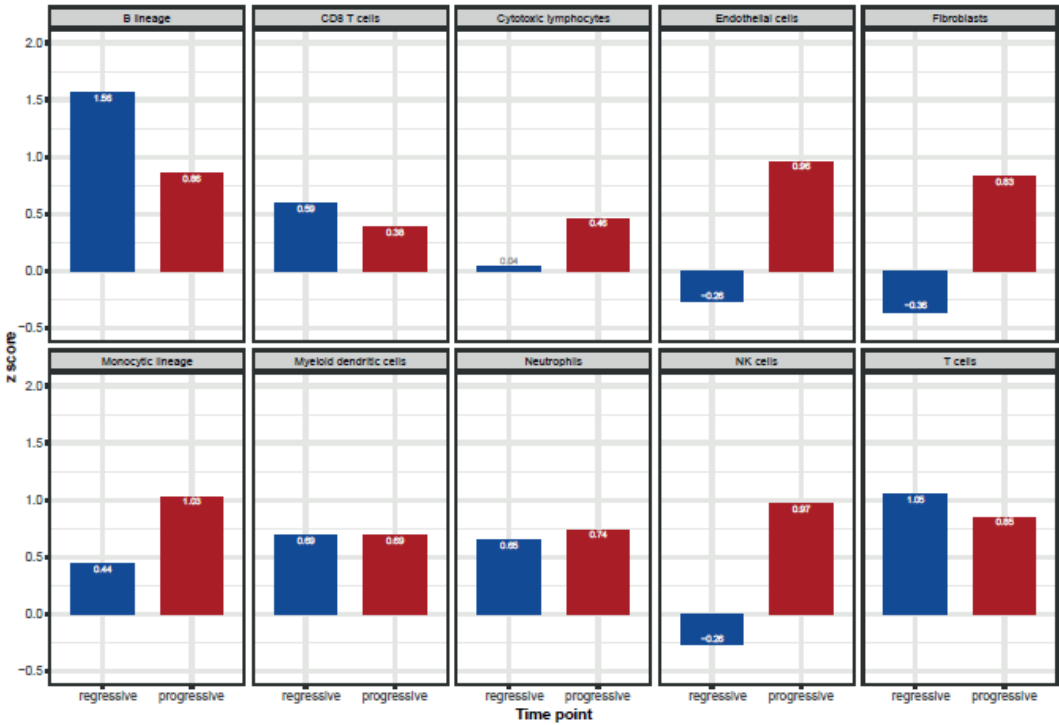

**B**

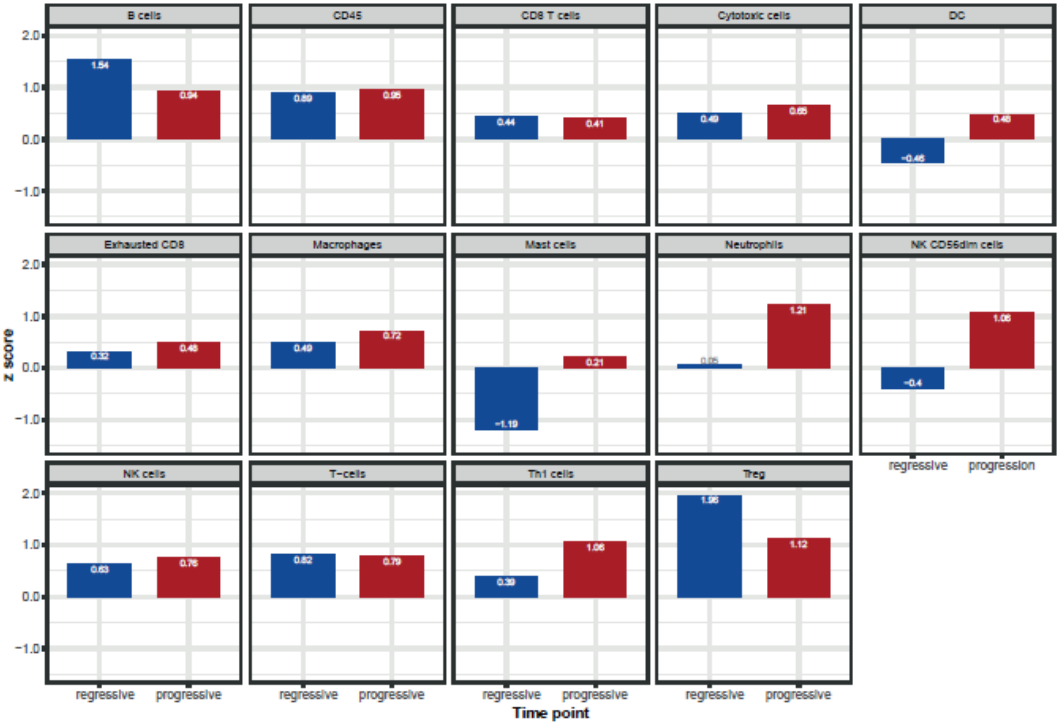

A. Overview of expression of MCP counter genes, in blue for regressive and in red for new progressive tumor lesion.

B. Overview of expression of Danaher genes, in blue for regressive and in red for new progressive tumor lesion.

Suppl. Figure 3. MCP counter and Danaher gene expression data of patient 3

**A**

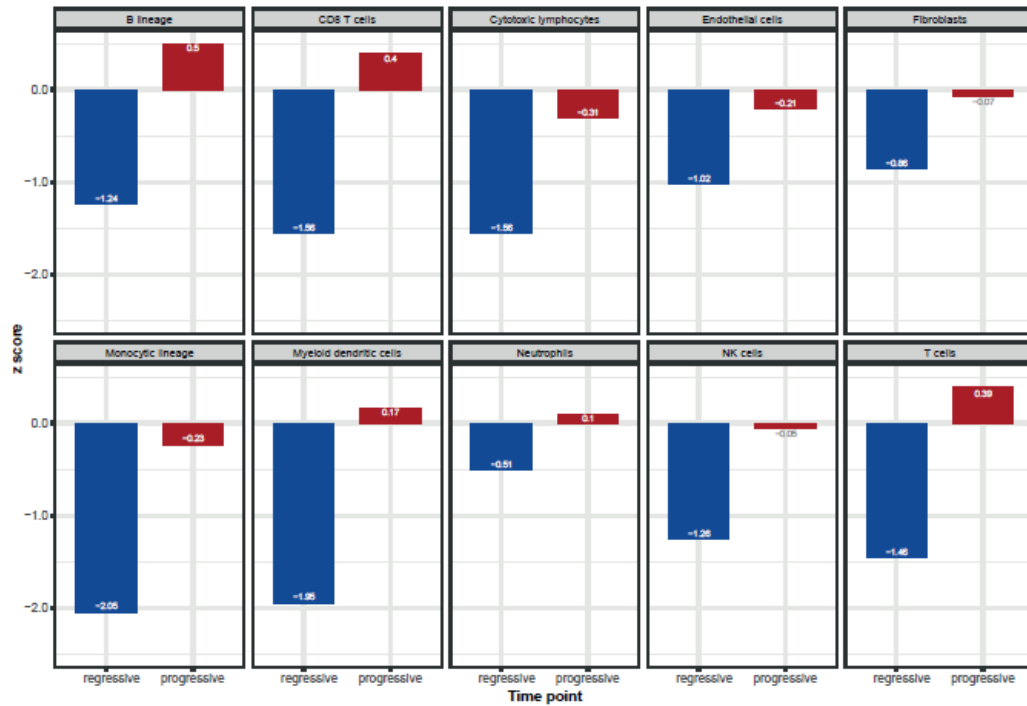

**B**

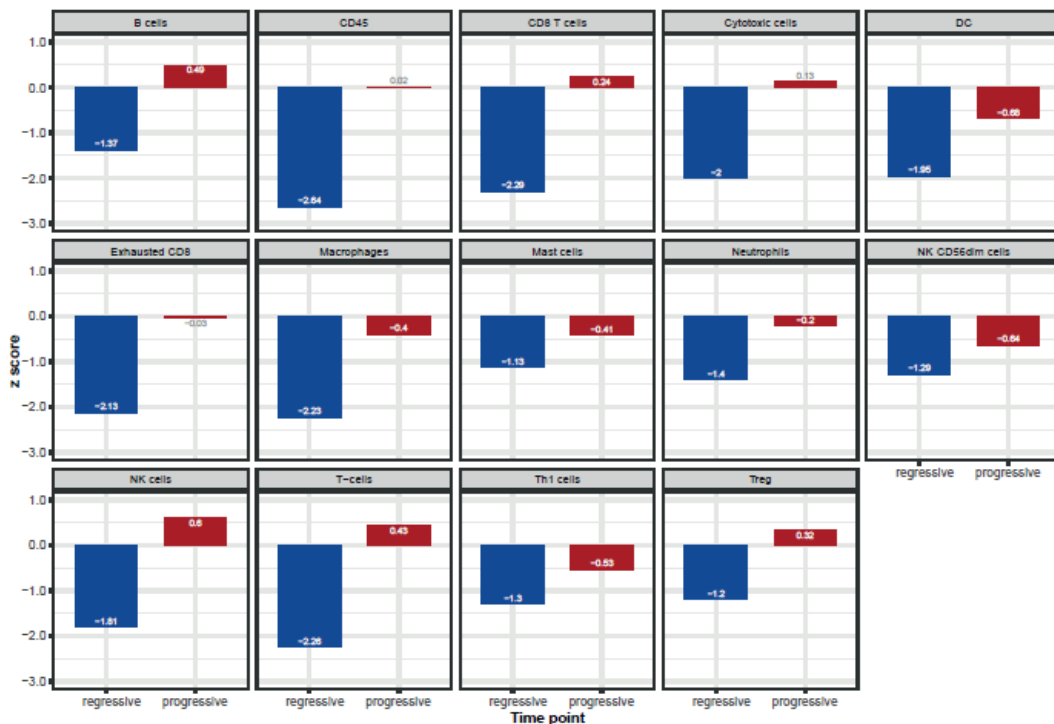

A. Overview of expression of MCP counter genes, in blue for regressive and in red for new progressive tumor lesion.

B. Overview of expression of Danaher genes, in blue for regressive and in red for new progressive tumor lesion.

Suppl. Figure 4. MCP counter and Danaher gene expression data of patient 4

A

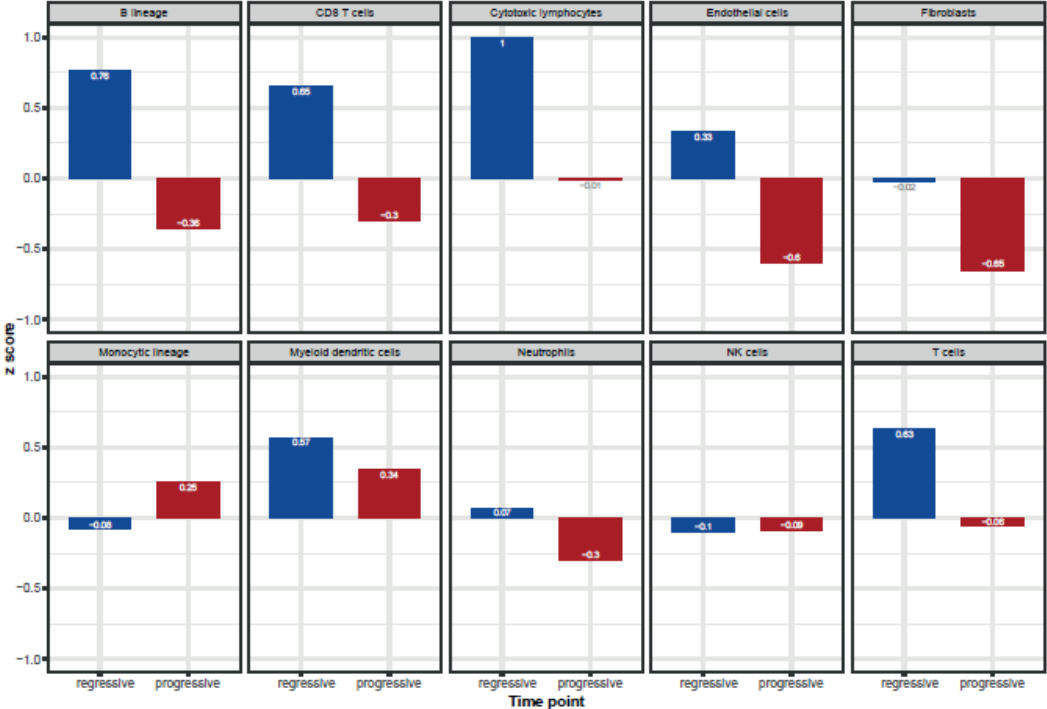

B

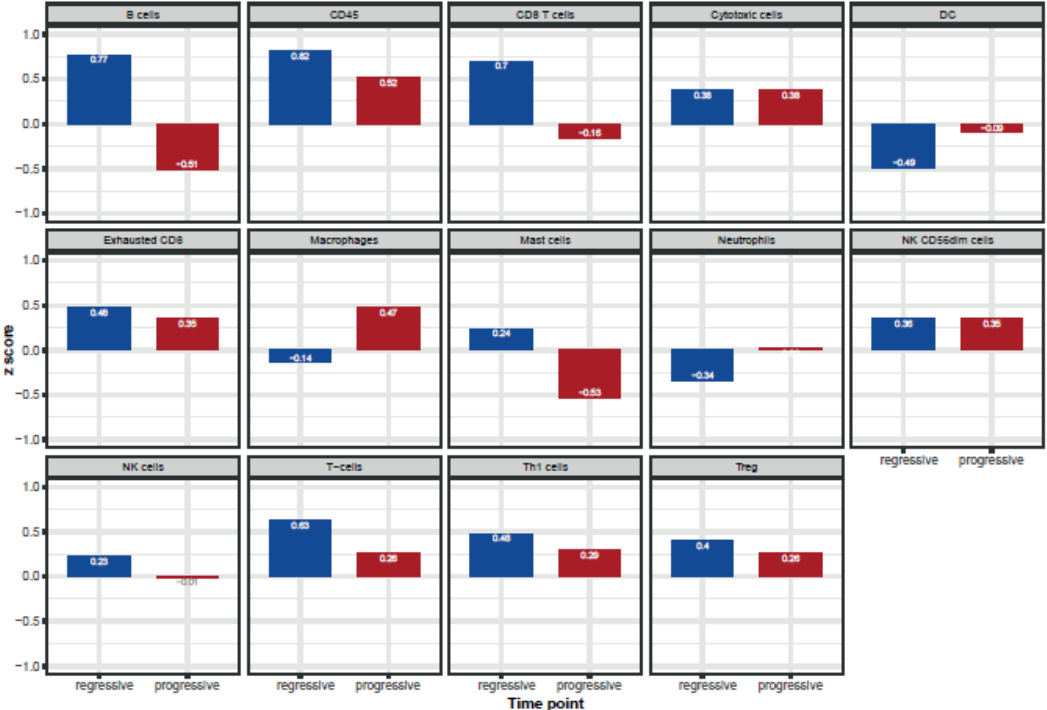

A. Overview of expression of MCP counter genes, in blue for regressive and in red for progressive tumor lesion.

B. Overview of expression of Danaher genes, in blue for regressive and in red for progressive tumor lesion.

Suppl. Figure 5. MCP counter and Danaher gene expression data of patient 5

**A**

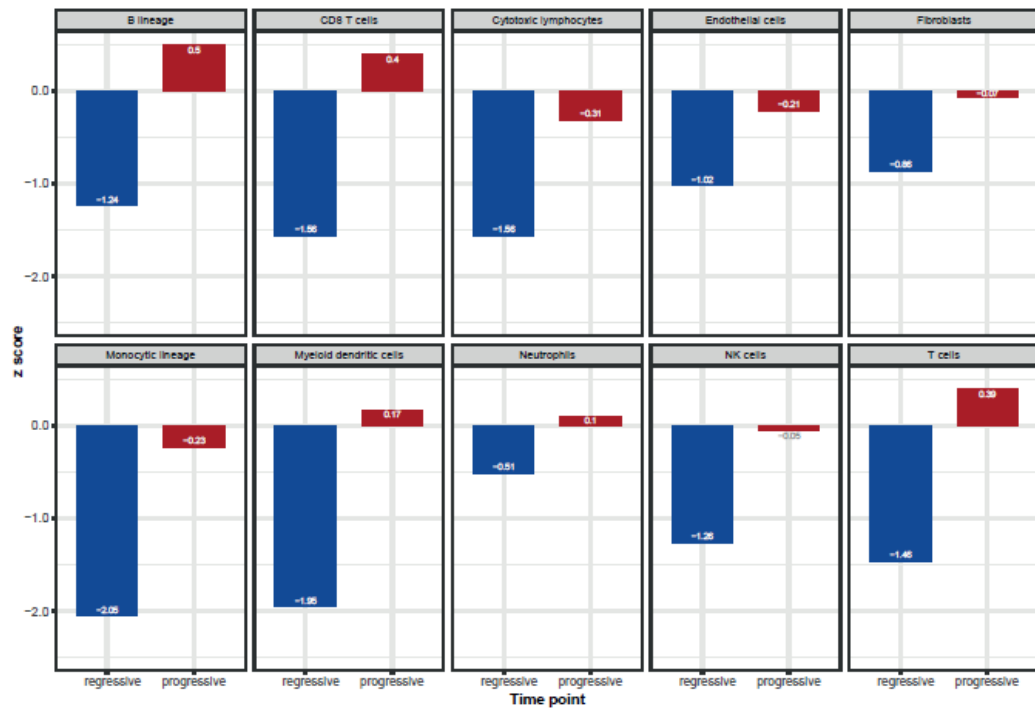

**B**

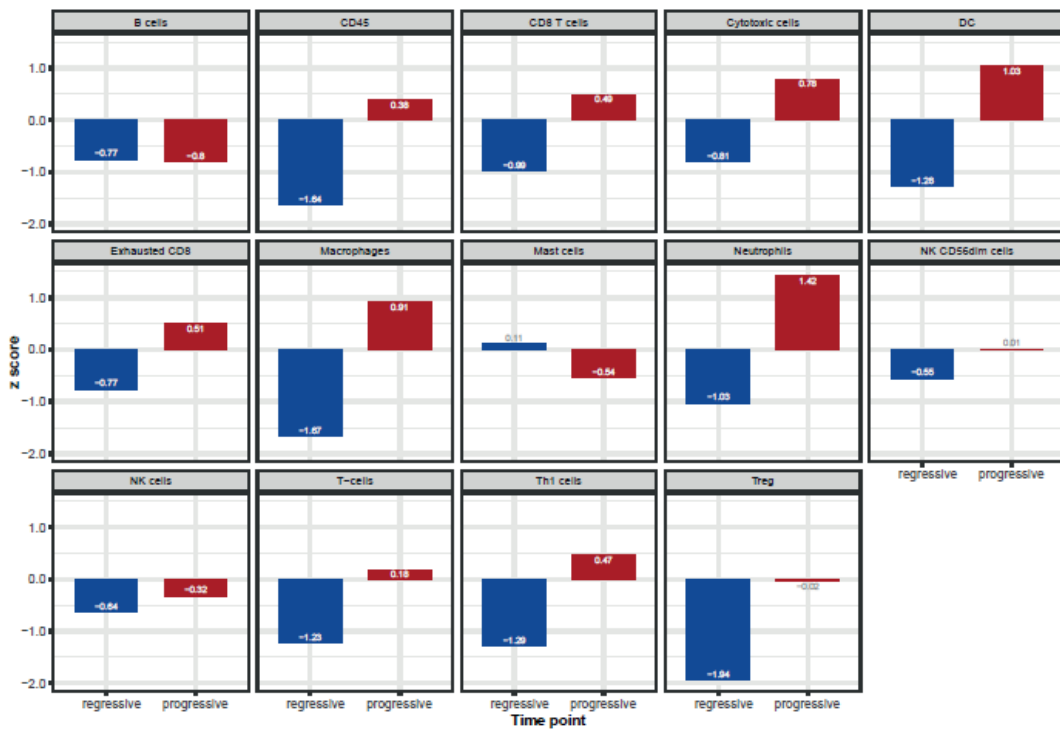

A. Overview of expression of MCP counter genes, in blue for regressive and in red for progressive tumor lesion.

B. Overview of expression of Danaher genes, in blue for regressive and in red for progressive tumor lesion.
